# Supplementary material for: High-pressure observation of elusive iodoplumbic acid in different hydronium-hydrate solid forms
Source: Royal Society of Chemistry journal article supplement (doi:10.1039/d3qi01102j), 2023-12-06
Supplement: d3qi01102j1.pdf [file d3qi01102j1.pdf]

# Supporting Information:

## High-pressure observation of elusive iodoplumbic acid in different hydronium-hydrate solid forms

Szymon Sobczak,<sup>[a]</sup> Athena M. Fidelli,<sup>[b]</sup> Jean-Louis Do<sup>[b]</sup>, George Demopoulos\*,<sup>[c]</sup> Audrey Moores\*<sup>[b]</sup>, Tomislav Friščić\*<sup>[b]</sup> and Andrzej Katrusiak\*<sup>[a]</sup>

[a] S. Sobczak, Prof. A. Katrusiak, Departament of Chemistry, Adam Mickiewicz University, Poznan, Uniwersytetu Poznańskiego 8, 61-619 Poznan, Poland

[b] Dr. Athena Fidelli, Prof. Tomislav Friščić, Department of Chemistry, McGill University, 801 Sherbrooke St. W., H3A 0B8 Montreal, Canada

[c] Department of Materials Engineering, McGill University

### General microscopy

For observing and controlling the growth of compounds **3**, **4** and  $\beta$ -PbI<sub>2</sub> single crystals, Olympus MVX10 microscope, equipped with MV PLAPO 1x FF objective was used, with a total optical magnification ranging from 4× to 80×, equipped with an Olympus Digital Camera SC 30/MVX-TV1XC. All crystal dimensions were measured with Olympus cellSens imaging software.

### Pseudosymmetry in **1**

Similarly as in SiC polytypes,<sup>10</sup> at least two structure can be found for the layered structure of **1**. Several independent single-crystal diffraction experiments have been made to identify the correct space group. Depending on the shift in the position of water molecules, occupying the interlayer space and arranged in a honeycomb formation, two different symmetries can be refined: monoclinic space group  $C2/m$  ( $mC$ ) and trigonal space group  $R-3m$  ( $hR$ ). However, the careful analysis of systematic absences suggests that the crystal belongs to  $mC$  group, which can be confused with the strained hexagonal lattice. This strain causes broadening of reflections along  $c^*$ , during the transformation from  $mC$  to  $hR$  leads to differentiation in the unit-cell parameters of about 0.04 Å and described by the matrix:

$$\begin{pmatrix} -1/2 & 0.5 & 0 \\ 0 & -1 & 0 \\ 1.5 & 0 & 3 \end{pmatrix} \begin{pmatrix} a_c \\ b_c \\ c_c \end{pmatrix} = \begin{pmatrix} a_r \\ b_r \\ c_r \end{pmatrix}$$

Where c and r indexes indicate  $mC$  to  $hR$  lattices, respectively.

## High-pressure experiments

For each high-pressure experiment a liquid solution of  $\text{PbI}_2$  dissolved in concentrated aqueous hydroiodic acid (HI, 57% by weight) was loaded to a modified Merrill-Bassett diamond anvil cell (DAC).<sup>1</sup> The DAC anvils were supported directly on the steel discs with conical windows (the culet size was 0.8 mm, type 1A diamonds, a steel gasket 0.15 mm thick, the hole diameter 0.45 mm).<sup>2</sup> Pressure in the DAC was determined by the ruby fluorescence (R1 ruby line) shift with a Photon Control spectrometer affording an accuracy of 0.02 GPa.<sup>3,4</sup>

The single-crystals of **3** and **4** were obtained in isochoric conditions: after the polycrystalline mass precipitated, the DAC with was heated using a hot-air gun till all but one grain melted. Then the single crystal grew as the DAC was cooled slowly to room temperature. Temperature inside DAC was determined using a dual-method approach: a laser thermometer directed at the diamond anvil's surface and a thermocouple mounted directly on the anvil. The high thermal conductivity of diamond ensured that the laser thermometer readings provide a reliable estimation of the DAC's internal temperature, which is cross-verified with the thermocouple measurements. The progress and experimental details on growing the single crystals of **3** and **4** are shown in Figures S1 and S2.

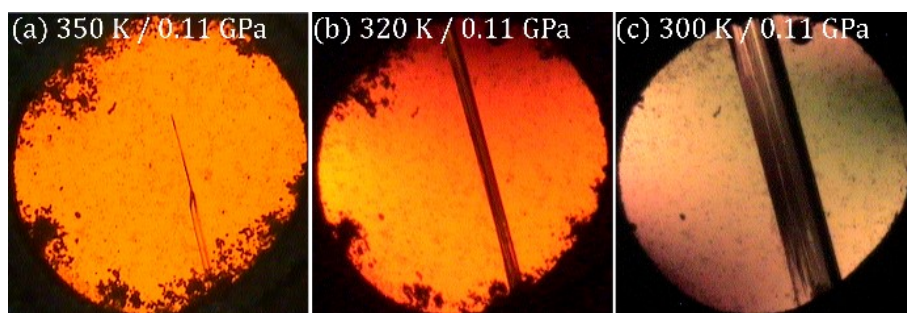

**Figure S1.** Single crystal of **3** grown *in situ* in a DAC in isochoric conditions at (a) 350 K; (b) 320 K and; (c) 300 K / 0.11 GPa. The ruby sphere for pressure calibration lies at the upper-right edge of the chamber

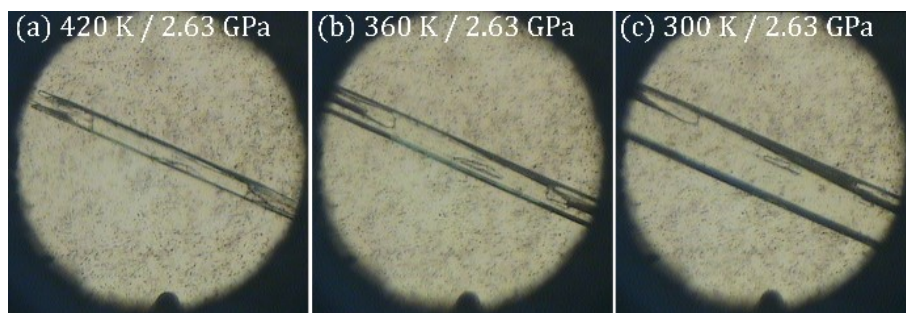

**Figure S2.** Single crystal of **4** grown *in situ* in a DAC in isochoric conditions at (a) 420 K; (b) 360 K and; (c) 300 K / 2.63 GPa. The ruby sphere for pressure calibration lies at the lower-edge of the chamber.

Single crystals of  $\beta\text{-PbI}_2$  were obtained similarly to those of **3** and **4**, however due to the phase transformation at room temperature at 1.2 GPa, the single crystal grown at 2.05 GPa was kept at 320 K and the X-ray diffraction experiment was performed at this temperature. Temperature inside DAC was determined using a dual-method approach: a laser thermometer directed at the diamond anvil's surface and a thermocouple mounted directly on the anvil. The high thermal conductivity of diamond ensured that the laser thermometer readings provide a reliable estimation of the DAC's internal temperature, which is cross-verified with the thermocouple measurements.

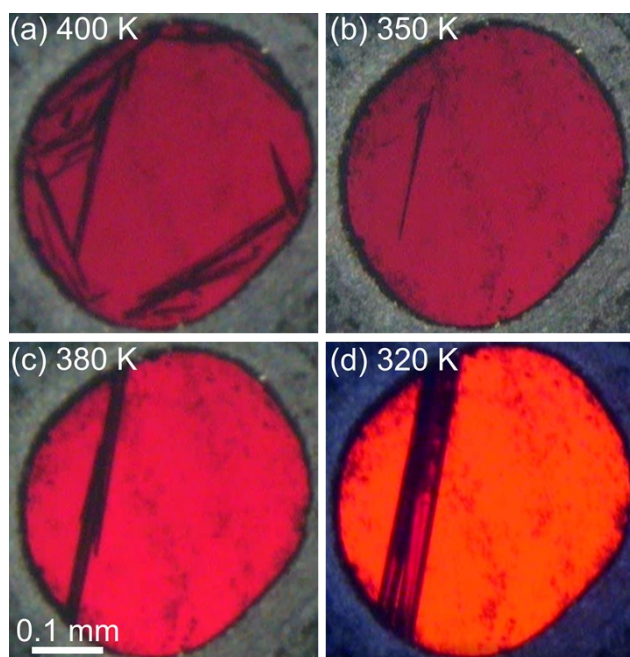

**Figure S3.** Isochoric growth (a-d) of the pink single-crystal of  $\beta\text{-PbI}_2$  in the DAC at 2.05 GPa. The  $\beta\text{-PbI}_2$  crystals display a reverse solubility phenomena resulting in crystal growth upon heating from 350 to 380 K.

Diffraction data were collected at 295 K for **1**, **3** and **4** and at 320 K for  $\beta$ -PbI<sub>2</sub>, by using a KM-4 CCD diffractometer with the graphite-monochromated MoK $\alpha$  radiation. The DAC was centered by the gasket-shadow method.<sup>5</sup> The CrysAlisCCD and CrysAlisRED programs<sup>6</sup> were used for collecting the data, determination of the UB-matrices, and for initial data reductions and Lp corrections. Reflection intensities were corrected for the DAC and sample absorption; the gasket shadowing and the reflections of diamond-anvils were eliminated.<sup>7</sup> All structures were solved by direct methods, and refined with anisotropic displacement parameters, with programs ShelXS and ShelXL<sup>8</sup> using Olex2 interface.<sup>9</sup> Details of structure refinements and crystal data are given in Table S1.

**Table S1.** Detailed crystallographic data for **1**, **3**, **4** and  $\beta$ -PbI<sub>2</sub>

| Compound                                                                          |              | <b>1</b><br>(H <sub>3</sub> O) <sub>2-x</sub> Pb <sub>x</sub> I <sub>2</sub> ·(2-2x)<br>H <sub>2</sub> O | <b>3</b><br>(H <sub>3</sub> O)PbI <sub>3</sub> ·4H <sub>2</sub> O | <b>3</b><br>(H <sub>3</sub> O)PbI <sub>3</sub> ·4H <sub>2</sub> O | <b>3</b><br>(H <sub>3</sub> O)PbI <sub>3</sub> ·4H <sub>2</sub> O | <b>4</b><br>(H <sub>3</sub> O)PbI <sub>3</sub> ·3H <sub>2</sub> O | $\beta$ -PbI <sub>2</sub>                                 |
|-----------------------------------------------------------------------------------|--------------|----------------------------------------------------------------------------------------------------------|-------------------------------------------------------------------|-------------------------------------------------------------------|-------------------------------------------------------------------|-------------------------------------------------------------------|-----------------------------------------------------------|
| CSD Number                                                                        |              | <b>2071140</b>                                                                                           | -                                                                 | <b>2071141</b>                                                    | <b>2071142</b>                                                    | <b>2071143</b>                                                    | <b>2071144</b>                                            |
| Pressure                                                                          |              | 0.1 MPa                                                                                                  | 0.20 GPa                                                          | 0.50 GPa                                                          | 1.20 GPa                                                          | 2.63 GPa                                                          | 2.05 GPa                                                  |
| Temperature                                                                       |              | 300 K                                                                                                    | 300 K                                                             | 300 K                                                             | 300 K                                                             | 300 K                                                             | 320 K                                                     |
| Formula weight                                                                    |              | 227.79                                                                                                   | 667.89                                                            | 667.89                                                            | 667.89                                                            | 651.89                                                            | 691.48                                                    |
| Wavelength (Å)                                                                    |              | 0.71073                                                                                                  | 0.71073                                                           | 0.71073                                                           | 0.71073                                                           | 0.71073                                                           | 0.71073                                                   |
| Crystal system                                                                    |              | monoclinic                                                                                               | monoclinic                                                        | monoclinic                                                        | monoclinic                                                        | monoclinic                                                        | monoclinic                                                |
| Space group                                                                       |              | <i>C2/c</i>                                                                                              | <i>I2/m</i>                                                       | <i>I2/m</i>                                                       | <i>I2/m</i>                                                       | <i>P2<sub>1</sub>/m</i>                                           | <i>C2/m</i>                                               |
| Unit cell dimensions                                                              | <i>a</i> (Å) | 4.5598(3)                                                                                                | 16.92(14)                                                         | 16.205(2)                                                         | 16.119(13)                                                        | 9.57(3)                                                           | 14.06(4)                                                  |
|                                                                                   | <i>b</i> (Å) | 11.1985(18)                                                                                              | 4.4666(7)                                                         | 4.51695(14)                                                       | 4.5261(9)                                                         | 4.513(3)                                                          | 4.4260(12)                                                |
|                                                                                   | <i>c</i> (Å) | 90                                                                                                       | 17.31(2)                                                          | 17.184(14)                                                        | 16.88(4)                                                          | 12.98(11)                                                         | 10.540(6)                                                 |
| Unit cell angles                                                                  | $\alpha$ (°) | 118.023(19)                                                                                              | 90.0                                                              | 90                                                                | 90                                                                | 90                                                                | 90                                                        |
|                                                                                   | $\beta$ (°)  | 90                                                                                                       | 112.0(4)                                                          | 111.50(4)                                                         | 111.25(17)                                                        | 95.9(6)                                                           | 93.08(12)                                                 |
|                                                                                   | $\gamma$ (°) | 355.86(9)                                                                                                | 90.0                                                              | 90                                                                | 90                                                                | 90                                                                | 90                                                        |
| Volume (Å <sup>3</sup> )                                                          |              | 1068.10(14)                                                                                              | 1213(10)                                                          | 1170.3(10)                                                        | 1147(3)                                                           | 558(5)                                                            | 654.9(17)                                                 |
| <i>Z</i> / <i>Z'</i>                                                              |              | 4/0.5                                                                                                    | 4/0.5                                                             | 4/0.5                                                             | 4/0.5                                                             | 2/0.5                                                             | 2/0.25                                                    |
| Molecular volume ( <i>V</i> / <i>Z</i> )                                          |              | 267.025                                                                                                  | 303.25                                                            | 292.575                                                           | 286.75                                                            | 279                                                               | 327.45                                                    |
| Calculated density (g/cm <sup>3</sup> )                                           |              | 4.252                                                                                                    | 3.657                                                             | 3.791                                                             | 3.866                                                             | 3.883                                                             | 7.013                                                     |
| Absorption (mm <sup>-1</sup> )                                                    |              | 27.566                                                                                                   | 24.068                                                            | 22.303                                                            | 22.746                                                            | 23.395                                                            | 52.550                                                    |
| <i>F</i> (000)                                                                    |              | 383.0                                                                                                    | -                                                                 | 1124.0                                                            | 1124.0                                                            | 546.0                                                             | 1128.0                                                    |
| Crystal size (mm)                                                                 |              | 0.1 × 0.1 × 0.05                                                                                         | 0.445 × 0.127 × 0.068                                             | 0.32 × 0.101 × 0.065                                              | 0.30 × 0.10 × 0.06                                                | 0.30 × 0.20 × 0.15                                                | 0.30 × 0.10 × 0.10                                        |
| 2 $\theta$ -range for data collection (°)                                         |              | 8.246 to 57.384                                                                                          | 7.0648 to 49.3486                                                 | 5.404 to 52.382                                                   | 8.758 to 51.294                                                   | 4.28 to 55.116                                                    | 3.87 to 52.736                                            |
| Min/max indices: <i>h</i> , <i>k</i> , <i>l</i>                                   |              | -10 ≤ <i>h</i> ≤ 10, -6 ≤ <i>k</i> ≤ 6, -15 ≤ <i>l</i> ≤ 15                                              | -4 ≤ <i>h</i> ≤ 4, -5 ≤ <i>k</i> ≤ 5, -19 ≤ <i>l</i> ≤ 19         | -19 ≤ <i>h</i> ≤ 19, -5 ≤ <i>k</i> ≤ 5, -5 ≤ <i>l</i> ≤ 5         | -16 ≤ <i>h</i> ≤ 16, -5 ≤ <i>k</i> ≤ 5, -7 ≤ <i>l</i> ≤ 8         | -10 ≤ <i>h</i> ≤ 8, -5 ≤ <i>k</i> ≤ 5, -8 ≤ <i>l</i> ≤ 6          | -8 ≤ <i>h</i> ≤ 8, -5 ≤ <i>k</i> ≤ 5, -12 ≤ <i>l</i> ≤ 12 |
| Reflect. Collected/unique                                                         |              | 3208/523                                                                                                 | 8331/-                                                            | 6503/335                                                          | 1022/323                                                          | 788/287                                                           | 2000/258                                                  |
| Rint                                                                              |              | 0.0541                                                                                                   | 0.2558                                                            | 0.0592                                                            | 0.1061                                                            | 0.1665                                                            | 0.2469                                                    |
| Refinement method                                                                 |              | Full-matrix least-squares on <i>F</i> <sup>2</sup>                                                       |                                                                   |                                                                   |                                                                   |                                                                   |                                                           |
| Completeness (%)                                                                  |              | 99.7                                                                                                     | 25.8                                                              | 39.5                                                              | 36.6                                                              | 23.3                                                              | 42.7                                                      |
| Data/restraints/parameters                                                        |              | 523/0/21                                                                                                 | -                                                                 | 335/0/42                                                          | 323/6/42                                                          | 287/39/38                                                         | 258/17/29                                                 |
| Goodness-of-fit on <i>F</i> <sup>2</sup>                                          |              | 1.019                                                                                                    | -                                                                 | 0.857                                                             | 1.035                                                             | 0.962                                                             | 1.067                                                     |
| Final <i>R</i> <sub>1</sub> / <i>wR</i> <sub>2</sub> ( <i>I</i> > 2 $\sigma$ (1)) |              | 0.0364 /0.0794                                                                                           | -                                                                 | 0.0329/0.0832                                                     | 0.0773/ 0.1686                                                    | 0.0851/0.2064                                                     | 0.0818/0.1946                                             |
| <i>R</i> <sub>1</sub> / <i>wR</i> <sub>2</sub> (all data)                         |              | 0.0492 /0.0877                                                                                           | -                                                                 | 0.0352/0.0853                                                     | 0.1013/0.1834                                                     | 0.2011/0.2788                                                     | 0.1309/0.2211                                             |
| Largest diff. peak/hole (e.Å <sup>-3</sup> )                                      |              | 2.72/-0.75                                                                                               | -                                                                 | 0.66/-0.55                                                        | 0.88/-1.01                                                        | 0.96/-1.02                                                        | 2.77/-1.63                                                |

$$w=1/(\sigma^2 F_o^2 + w_1^2 * P^2 + w_2 * P), \text{ where } P=(\text{Max}(F_o^2, 0) + 2 * F_c^2)$$

## Ball-Milling experiments

### Milling Synthesis of $[\text{H}_3\text{O}]_{2x}[\text{Pb}_{1-x}\text{I}_2] \cdot (2-2x)\text{H}_2\text{O}$ (**1**)

For the ball-milling synthesis, 0.461 g (1 mmol) of  $\text{PbI}_2$  was added to one half of zirconia ( $\text{ZrO}_2$ ) 10 mL jars, followed by the addition of 67  $\mu\text{L}$  (0.5 mmol) of aqueous hydroiodic acid (HI 57%) and one 3.5 g zirconia ball. The jar was carefully sealed and placed on a MM400 mixer mill and the reaction mixture was milled for 30 minutes at an oscillation rate of 30 Hz. Reaction completion afforded a bright yellow product, which was left to dry in dark for 1h. The resulting solid product was scraped off the jar walls and subjected to powder X-ray diffraction (PXRD) analysis, revealing the formation of compound **1**. Compound **1** can be also isolated when performing the 1:1 stoichiometric reaction by milling 0.230 g (0.5 mmol) of  $\text{PbI}_2$  with 67  $\mu\text{L}$  (0.5 mmol) of aqueous hydroiodic acid (HI 57%), respectively.

### Milling Synthesis of $(\text{H}_3\text{O})_2\text{Pb}_3\text{I}_8 \cdot 6\text{H}_2\text{O}$ (**2**)

For the ball-milling synthesis 0.230 g (0.5 mmol) of  $\text{PbI}_2$  was added to one half of zirconia ( $\text{ZrO}_2$ ) 10 mL jars, followed by the addition of 201  $\mu\text{L}$  (1.5 mmol) of aqueous hydroiodic acid (HI 57%) and one 3.5 g zirconia ball. The jar was carefully sealed and placed on a MM400 mixer mill and the reaction mixture was milled for 30 minutes at an oscillation rate of 30 Hz. Reaction completion afforded a bright yellow product, which was left to dry in dark overnight. The resulting product was scraped off the jar walls and subjected to powder X-ray diffraction (PXRD) analysis, revealing the formation of compound **2**.

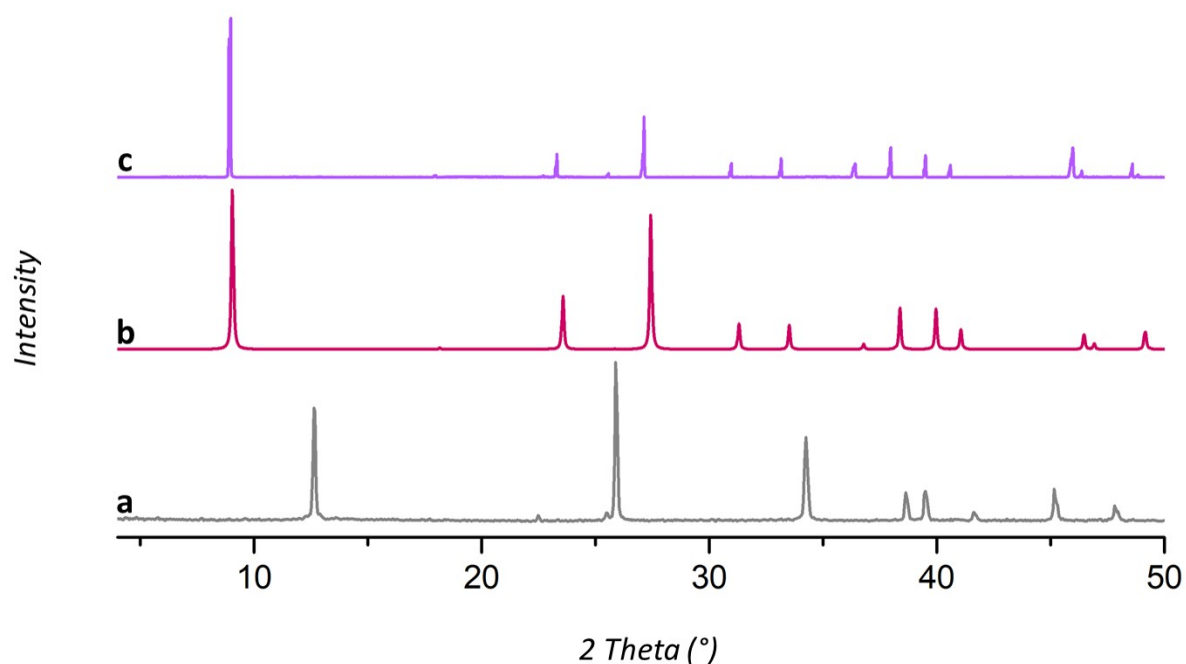

**Figure S4.** Powder X-ray diffraction patterns: a) experimental pattern of  $\text{PbI}_2$  (Sigma Aldrich) b) simulated pattern of  $[\text{H}_3\text{O}]_{2x}[\text{Pb}_{1-x}\text{I}_2] \cdot (2-2x)\text{H}_2\text{O}$  (**1**) and c) experimental pattern of the milling product from the  $1.5\text{PbI}_2:\text{HI}$  stoichiometric reaction.

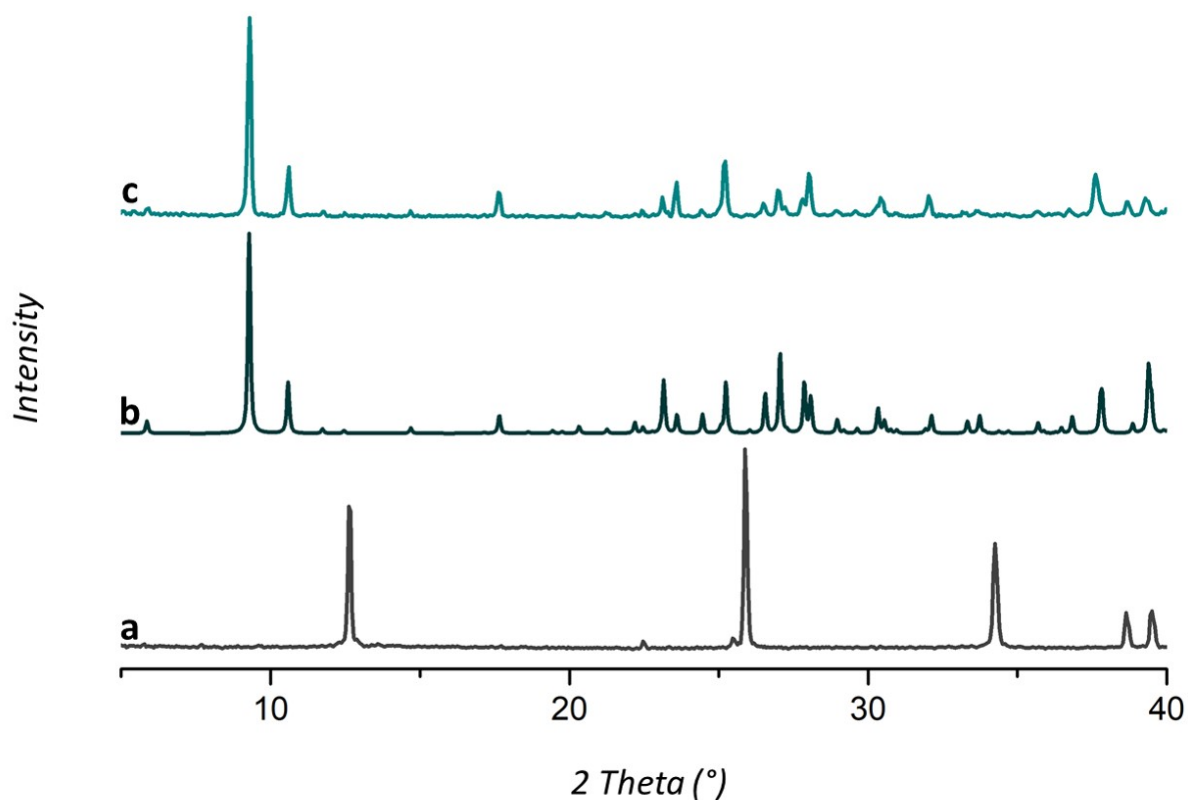

**Figure S5.** Powder X-ray diffraction patterns: a) experimental pattern of  $\text{PbI}_2$  (Sigma Aldrich) b) simulated pattern of  $(\text{H}_3\text{O})_2\text{Pb}_3\text{I}_8 \cdot 6\text{H}_2\text{O}$  (**2**) and c) experimental pattern of the milling product from the  $\text{PbI}_2:3\text{HI}$  stoichiometric reaction.

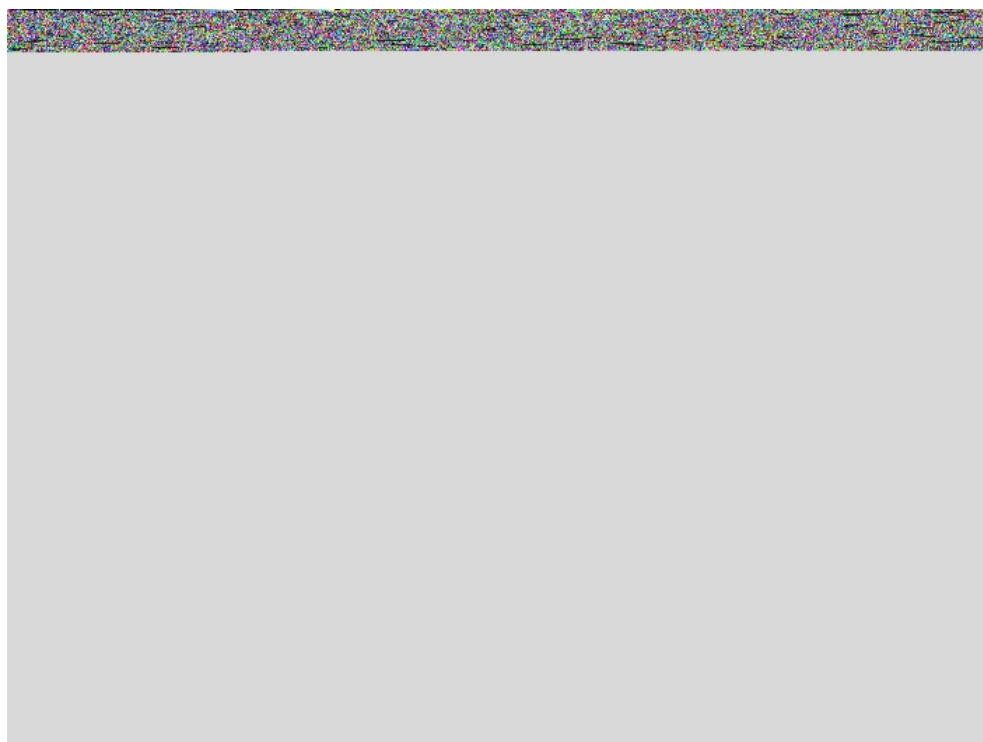

**Figure S6.** The ORTEP drawing of  $(\text{H}_3\text{O})_{2-x}\text{Pb}_x\text{I}_2 \cdot (2-2x)\text{H}_2\text{O}$  (**1**) crystal structure collected at ambient pressure.

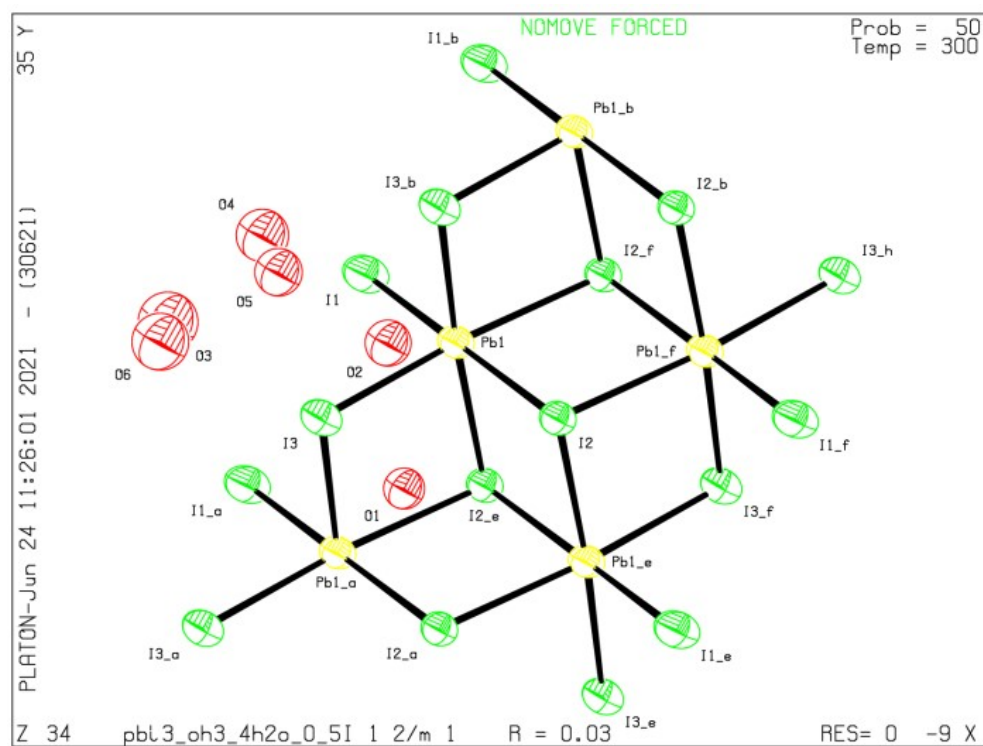

**Figure S7.** The ORTEP drawing of  $(\text{H}_3\text{O})\text{PbI}_3 \cdot 4\text{H}_2\text{O}$  (**3**) crystal structure determined at 0.5 GPa.

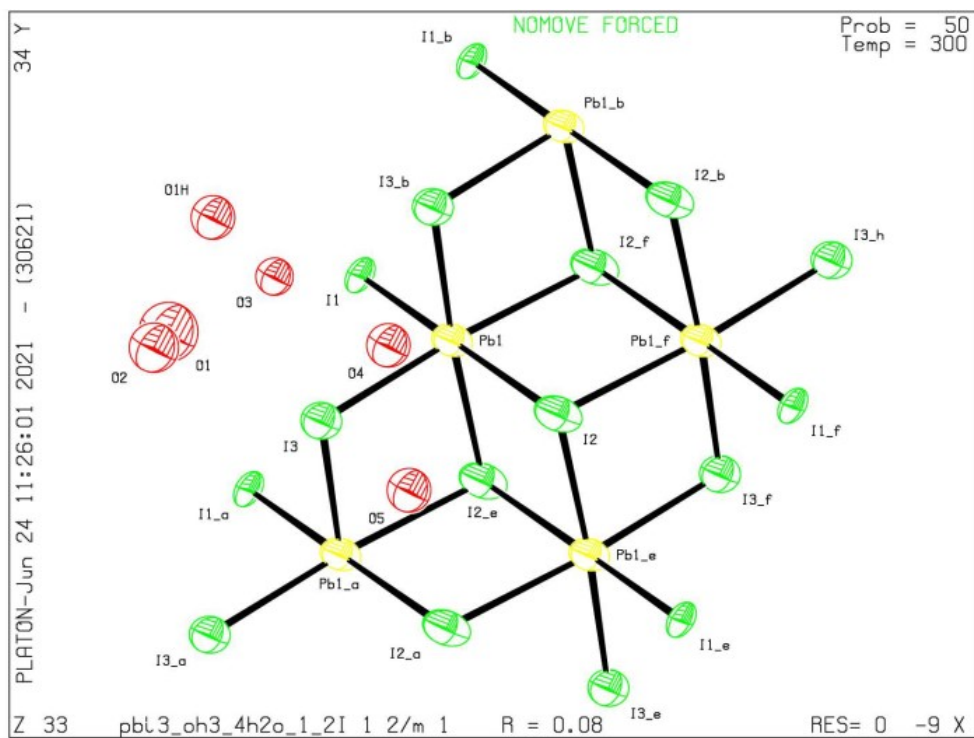

**Figure S8.** The ORTEP drawing of  $(\text{H}_3\text{O})\text{PbI}_3 \cdot 4\text{H}_2\text{O}$  (**3**) crystal structure observed at 1.2 GPa.

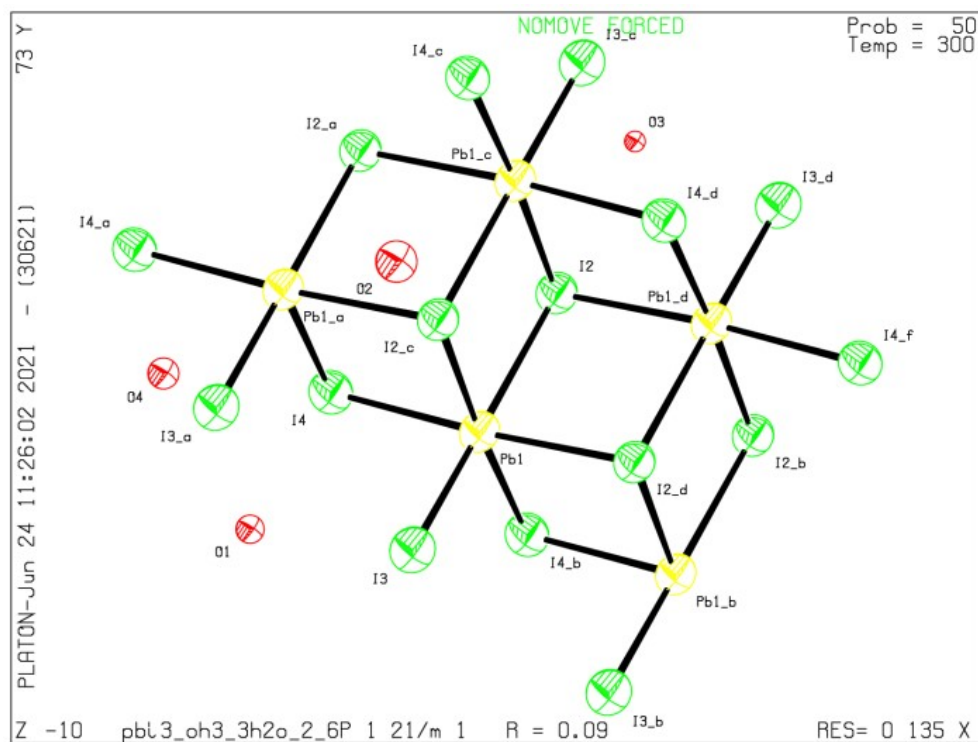

**Figure S9.** The ORTEP drawing of  $(\text{H}_3\text{O})\text{PbI}_3 \cdot 3\text{H}_2\text{O}$  (**4**) crystal structure collected at 2.63 GPa



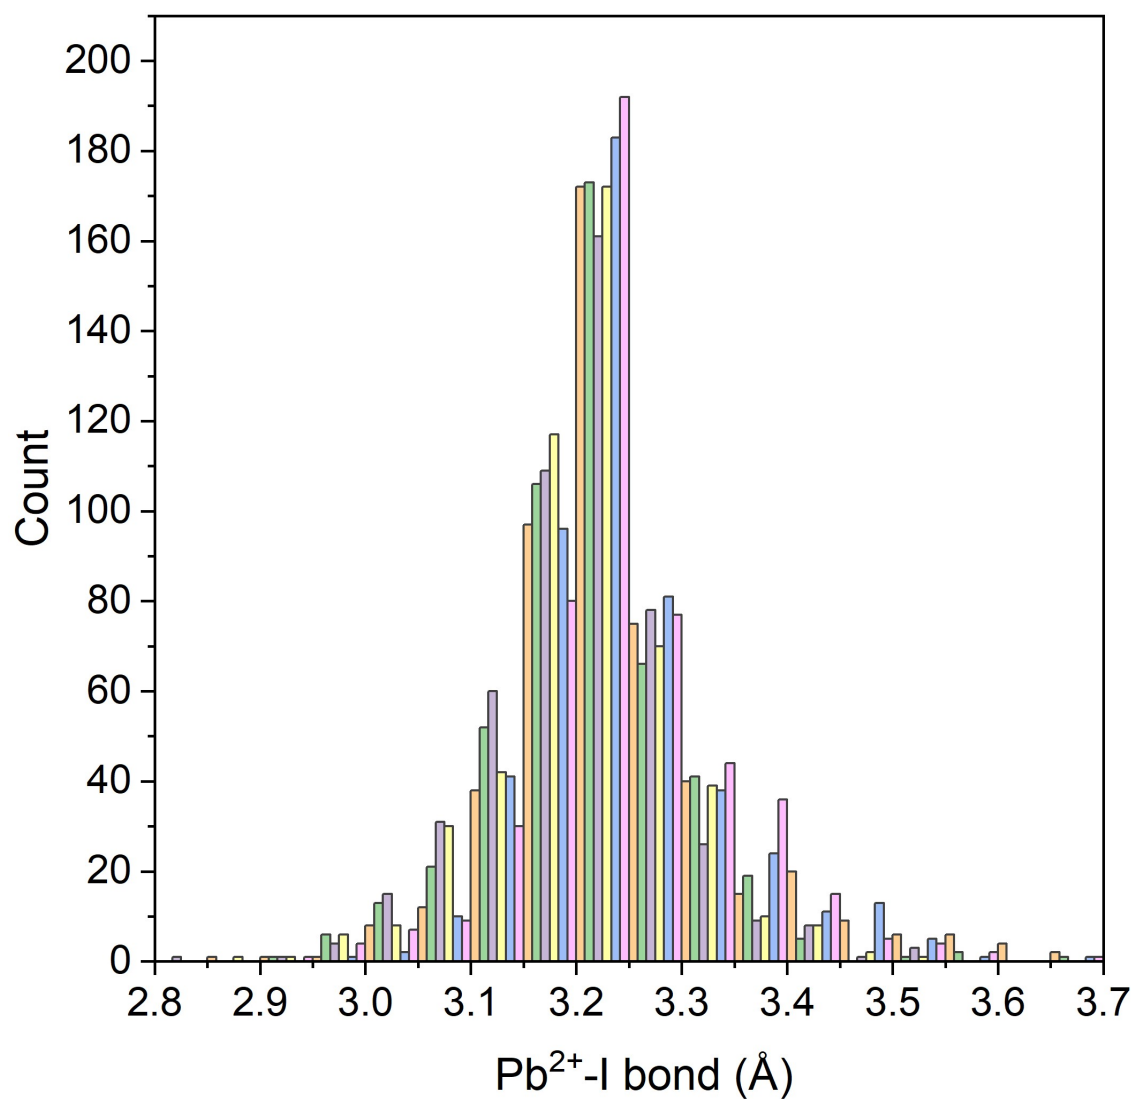

**Figure S10.** Histogram of Pb(II)–I bond distances in 6-coordinate complexes in crystals deposited in the Cambridge Structural Database (November 2021 release).<sup>11</sup>

## References

- (1) Merrill, L.; Bassett, W. A. Miniature Diamond Anvil Pressure Cell for Single Crystal X-Ray Diffraction Studies. *Rev. Sci. Instrum.* **1974**, *45* (2), 290–294. <https://doi.org/10.1063/1.1686607>.
- (2) Katrusiak, A. High-Pressure Devices. In *International Tables for Crystallography* (2019). Vol. H.; 2019; pp 156–173. <https://doi.org/10.1107/97809553602060000942>.
- (3) Mao, H. K.; Xu, J.; Bell, P. M. Calibration of the Ruby Pressure Gauge to 800 Kbar under Quasi-Hydrostatic Conditions. *Journal of Geophysical Research*. 1986, pp 4673–4676. <https://doi.org/10.1029/jb091ib05p04673>.
- (4) Piermarini, G. J.; Block, S.; Barnett, J. D.; Forman, R. A. Calibration of the Pressure Dependence of the R1ruby Fluorescence Line to 195 Kbar. *J. Appl. Phys.* **1975**, *46* (6), 2774–2780. <https://doi.org/10.1063/1.321957>.
- (5) Budzianowski, A.; Katrusiak, A. High-Pressure Crystallographic Experiments with a CCD-Detector. In *High-Pressure Crystallography*; Springer Netherlands: Dordrecht, 2004; Vol. 140, pp 101–112. [https://doi.org/10.1007/978-1-4020-2102-2\\_7](https://doi.org/10.1007/978-1-4020-2102-2_7).
- (6) Oxford Diffraction (2004). Oxford Diffraction Ltd., Xcalibur CCD system, CrysAlis Software system, Version 1.171
- (7) Katrusiak, A. Shadowing and Absorption Corrections of Single-Crystal High-Pressure Data. *Zeitschrift für Krist. - Cryst. Mater.* **2004**, *219* (8), 461–467. <https://doi.org/10.1524/zkri.219.8.461.38328>.
- (8) Sheldrick, G. M. Crystal Structure Refinement with SHELXL. *Acta Crystallogr. Sect. C Struct. Chem.* **2015**, *71* (1), 3–8. <https://doi.org/10.1107/S2053229614024218>.
- (9) Dolomanov, O. V.; Bourhis, L. J.; Gildea, R. J.; Howard, J. A. K.; Puschmann, H. OLEX2: A Complete Structure Solution, Refinement and Analysis Program. *J. Appl. Crystallogr.* **2009**, *42* (2), 339–341. <https://doi.org/10.1107/S0021889808042726>.
- (10) Lambrecht, W. R. L.; Limpijumnong, S.; Rashkeev, S. N.; Segall, B. Electronic Band Structure of SiC Polytypes: A Discussion of Theory and Experiment. *Phys. status solidi* **1997**, *202* (1), 5–33. [https://doi.org/10.1002/1521-3951\(199707\)202:1<5::AID-PSSB5>3.0.CO;2-L](https://doi.org/10.1002/1521-3951(199707)202:1<5::AID-PSSB5>3.0.CO;2-L).
- (11) Groom, C. R.; Bruno, I. J.; Lightfoot, M. P.; Ward, S. C. The Cambridge Structural Database. *Acta Crystallogr. Sect. B Struct. Sci. Cryst. Eng. Mater.* **2016**, *72* (2), 171–179. DOI: 10.1107/S2052520616003954
